# Supplementary material for: Genotoxic Effects of Etoposide, Bleomycin, and Ethyl Methanesulfonate on Cultured CHO Cells: Analysis by GC-MS/MS and Comet Assay
Source: Hindawi journal article supplement (doi:10.1155/2020/8810105), 2020-07-30

**Supplementary Materials**

**Genotoxic Effects of Etoposide, Bleomycin and Ethyl Methanesulfonate on Cultured CHO cells: Analysis by GC-MS/MS and Comet assay**

**Donald H. Atha<sup>\*1</sup>, Erdem Coskun<sup>2</sup>, Onur Erdem<sup>3</sup>, Alessandro Tona<sup>1</sup>, Vytas Reipa<sup>1</sup>**

**and Bryant C. Nelson<sup>1</sup>**

<sup>1</sup> National Institute of Standards and Technology, Biosystems and Biomaterials Division, Materials Measurement Laboratory, Gaithersburg, MD 20899.

<sup>2</sup> University of Maryland, Institute for Bioscience and Biotechnology Research, Rockville, MD 20850.

<sup>3</sup> University of Health Sciences, Department of Toxicology, Gulhane Faculty of Pharmacy, Ankara, Turkey.

## *GC-MS/MS Analysis*

We utilized gas chromatography-tandem mass spectrometry (GC-MS/MS) with isotope dilution using stable isotope-labelled analogues of analytes as internal standards to positively identify and accurately quantify the following DNA base lesions in genomic DNA: 8-OH-Gua, 5-OH-MeUra, 2,6-diamino-4-hydroxy-5-formamidopyrimidine (FapyGua), 4,6-diamino-5-formamidopyrimidine (FapyAde), 5-hydroxy-5-methylhydantoin (5-OH-5-MeHyd), 5-OH-Cyt, 5-OH-Ura and 8-OH-Ade. Aliquots of 8-OH-Gua-<sup>15</sup>N<sub>5</sub>, 5-OH-Me-Ura <sup>13</sup>C, <sup>15</sup>N<sub>2</sub>, FapyGua-<sup>13</sup>C, <sup>15</sup>N<sub>2</sub>, FapyAde-<sup>13</sup>C, <sup>15</sup>N<sub>2</sub>, <sup>15</sup>N<sub>2</sub>, 5-OH-5-MeHyd-<sup>13</sup>C, 5-OH-Cyt-<sup>13</sup>C, <sup>15</sup>N<sub>2</sub>, 5-OH-Ura-<sup>13</sup>C<sub>4</sub>, <sup>15</sup>N<sub>2</sub> and 8-OH Ade <sup>13</sup>C, <sup>15</sup>N<sub>2</sub> were added as internal standards. The following mass transitions were used in mass spectrometric analysis:  $m/z$  455  $\rightarrow$   $m/z$  440 and  $m/z$  460  $\rightarrow$   $m/z$  445 for 8-OH-Gua and 8-OH-Gua-<sup>15</sup>N<sub>5</sub>, respectively;  $m/z$  353  $\rightarrow$   $m/z$  343 and  $m/z$  262  $\rightarrow$   $m/z$  347 for 5-OH-MeUra and 5-OH-MeUra <sup>13</sup>C, D, respectively;  $m/z$  457  $\rightarrow$   $m/z$  368 and  $m/z$  460  $\rightarrow$   $m/z$  371 for FapyGua and FapyGua-<sup>13</sup>C, <sup>15</sup>N<sub>2</sub>, respectively;  $m/z$  369  $\rightarrow$   $m/z$  354 and  $m/z$  372  $\rightarrow$   $m/z$  357 for FapyAde and FapyAde- <sup>13</sup>C, <sup>15</sup>N<sub>2</sub>, respectively;  $m/z$  346  $\rightarrow$   $m/z$  331 and  $m/z$  349  $\rightarrow$   $m/z$  334 for 5-OH-5-MeHyd and 5-OH-5-MeHyd-<sup>13</sup>C, <sup>15</sup>N<sub>2</sub>, respectively;  $m/z$  343  $\rightarrow$   $m/z$  342 and  $m/z$  346  $\rightarrow$   $m/z$  345 for 5-OH-Cyt and 5-OH-Cyt-<sup>13</sup>C, <sup>15</sup>N<sub>2</sub>, respectively;  $m/z$  344  $\rightarrow$   $m/z$  343 and  $m/z$  350  $\rightarrow$   $m/z$  349 for 5-OH-Ura and 5-OH-Ura-<sup>13</sup>C<sub>4</sub>, <sup>15</sup>N<sub>2</sub>, respectively;  $m/z$  367  $\rightarrow$   $m/z$  352 and  $m/z$  370  $\rightarrow$   $m/z$  355 for 8-OH Ade and 8-OH Ade <sup>13</sup>C, <sup>15</sup>N<sub>2</sub> respectively. GC-MS/MS measurements were conducted as described previously (see main text Materials and Methods).

Figure S1: Complete GC-MS/MS data comparing the induction of the DNA lesions by etoposide, bleomycin and EMS. The first three lesions (8-OH Gua, Fapy Gua and 5-OH MeUra), show increasing trends with bleomycin (bleo) compared to the lack of any significant increases after treatment by etoposide (etop) and EMS (ems). The remaining lesions (FapyAde, 5-OH-5-MeHyd, 5-OH-Cyt, 5-OH-Ura, and 8-OH-Ade), did not show significant increases after treatment by etoposide, bleomycin and EMS. Data is presented as mean and standard deviation of 4 replicates.

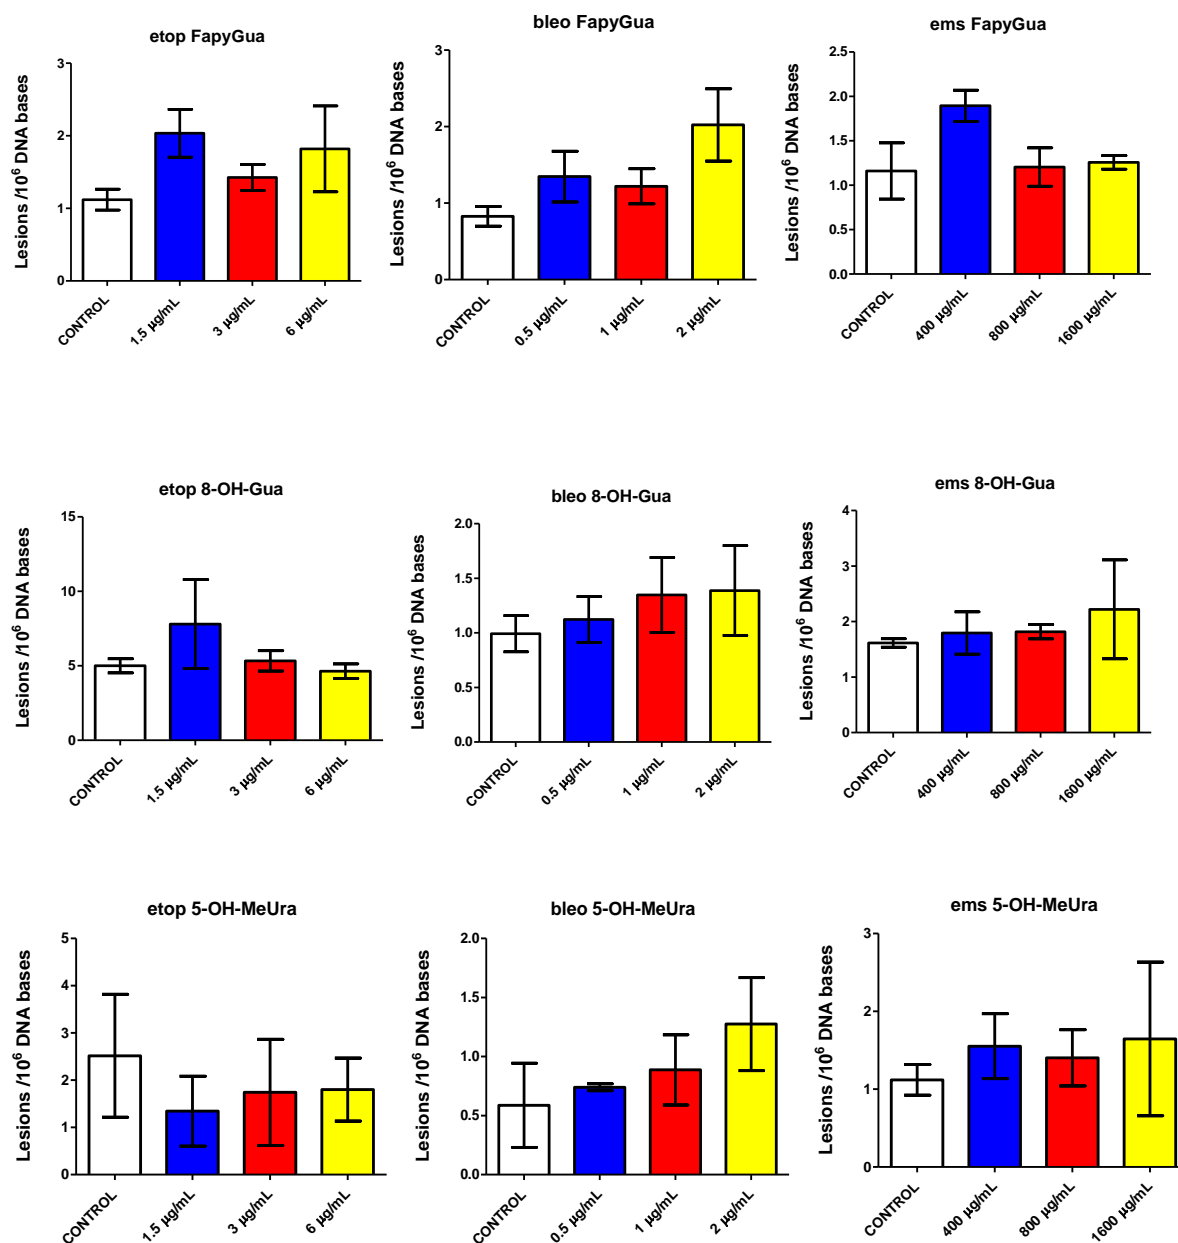

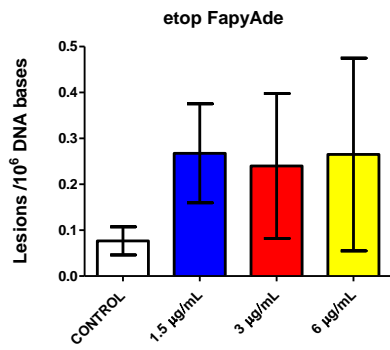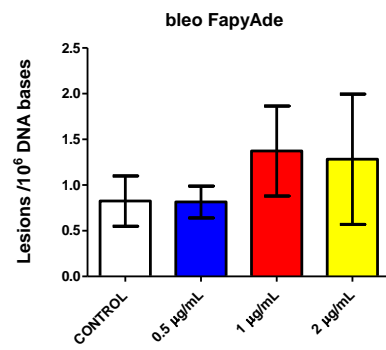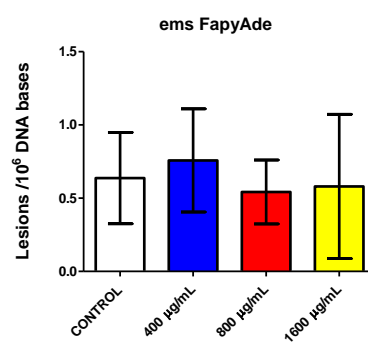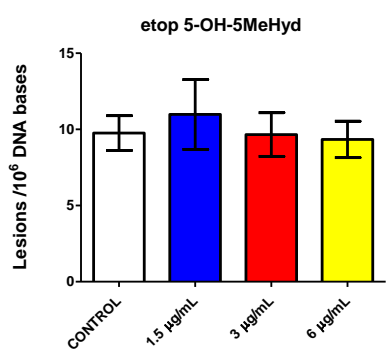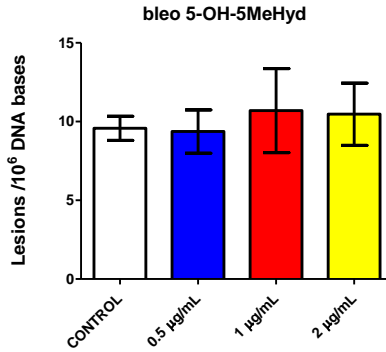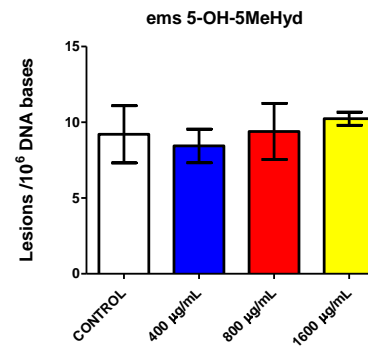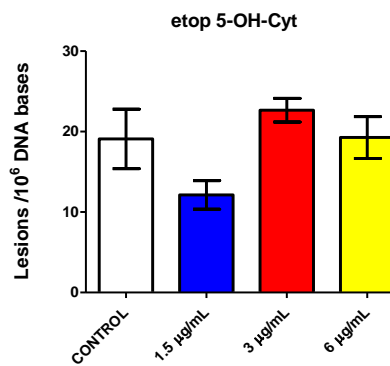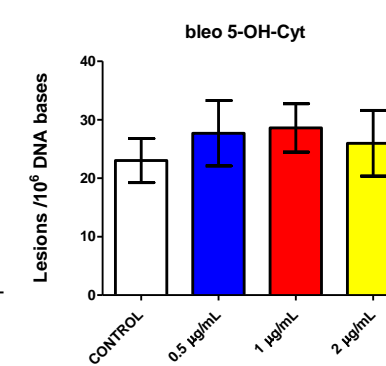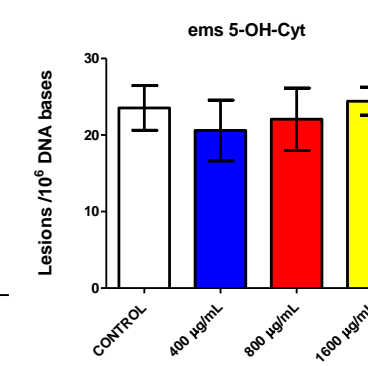

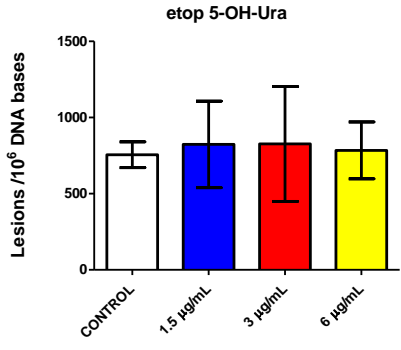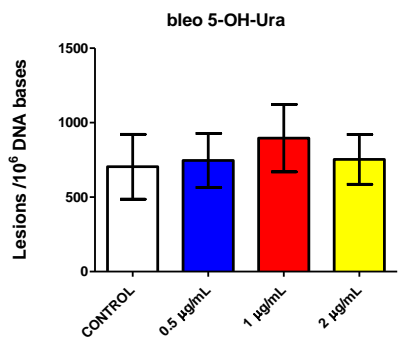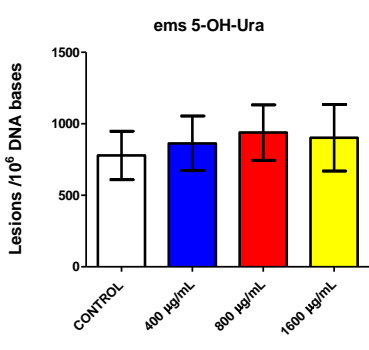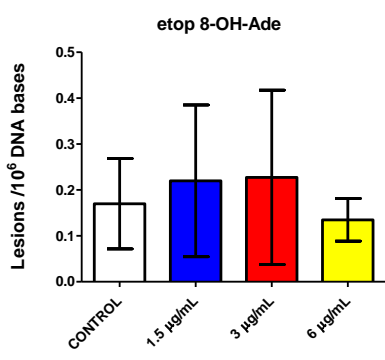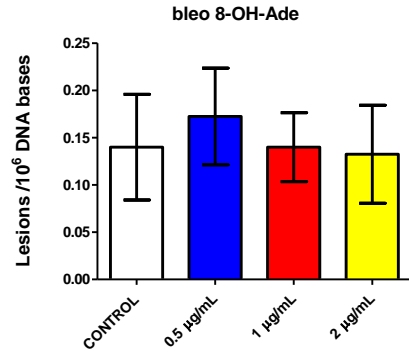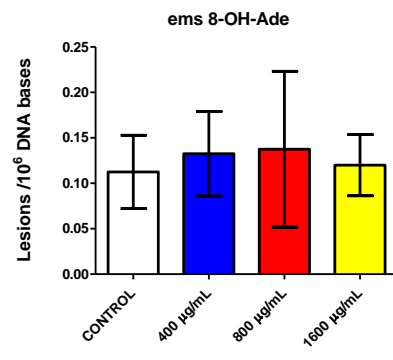

Supplement: f1 [file 8810105.f1.pdf]
